# Supplementary material for: Minerality in Wine: Textual Analysis of Chablis Premier Cru Tasting Notes
Source: Hindawi journal article supplement (doi:10.1155/2024/4299446), 2024-02-29
Supplement: f1 [file 4299446.f1.docx]

# Minerality in wine: textual analysis of Chablis Premier Cru tasting notes

Alex J. Biss1 and Richard H. Ellis1

1School of Agriculture, Policy and Development, University of Reading, Whiteknights, PO Box 237, Reading, RG6 6EU, United Kingdom

Correspondence should be addressed to Alex J. Biss; alex.biss@pgr.reading.ac.uk

## Supplementary Materials

Supplementary Table S1. The 17 principal Chablis Premier Cru Climats and their land area (m2).
From Biss [30].

| **Principal Climat** | **Area (m2)** |
| --- | --- |
| Beauroy | 639,721 |
| Berdiot | 19,643 |
| Chaume de Talvat | 108,694 |
| Côte de Jouan | 93,634 |
| Côte de Léchet | 529,063 |
| Côte de Vaubarousse | 14,405 |
| Fourchaume | 1,380,278 |
| Les Beauregards | 200,363 |
| Les Fourneaux | 356,856 |
| Mont de Milieu | 462,275 |
| Montée de Tonnerre | 431,501 |
| Montmains | 1,226,405 |
| Vaillons | 1,359,980 |
| Vau de Vey | 401,381 |
| Vau Ligneau | 313,640 |
| Vaucoupin | 523,170 |
| Vosgros | 233,102 |

***
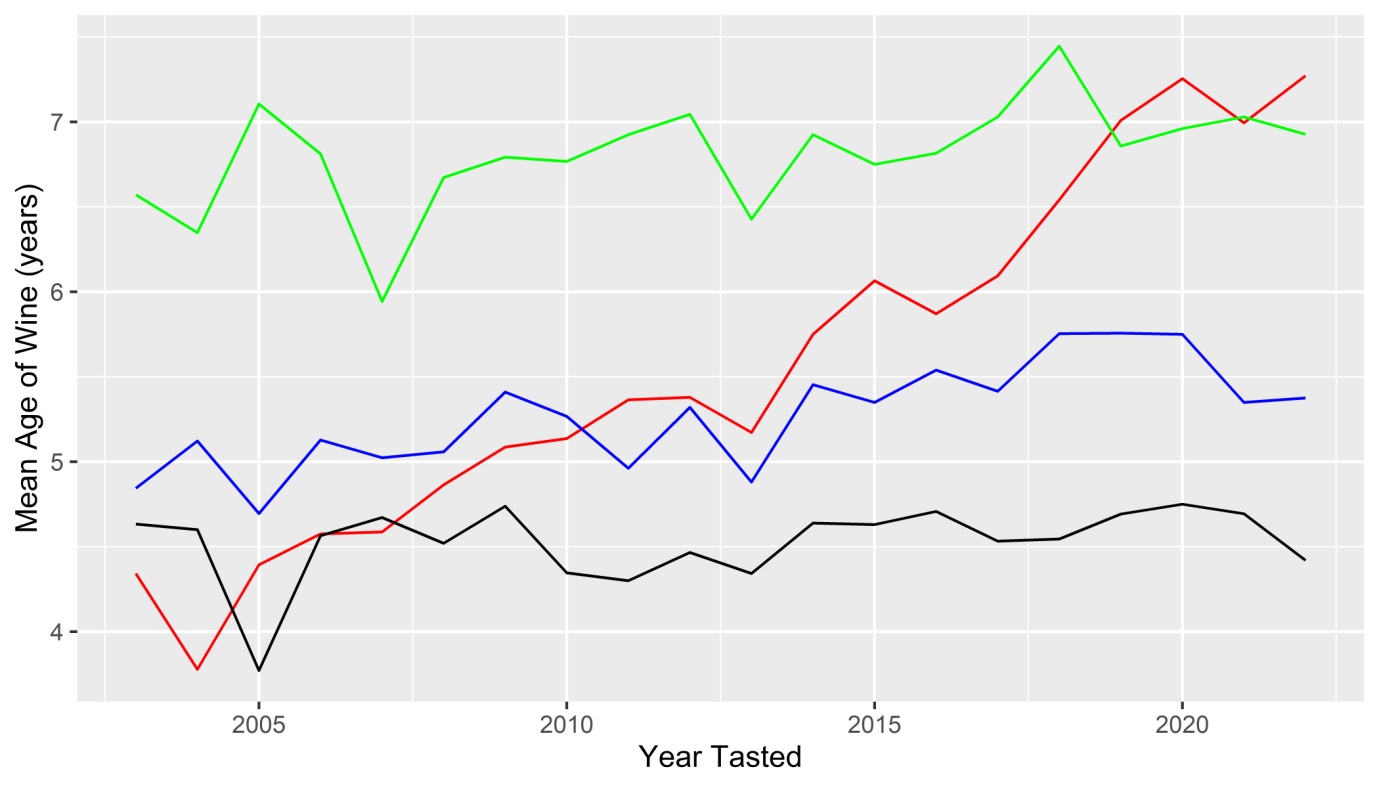
***

Supplementary Figure S1. Mean age of Chablis Premier Cru wine recorded each year in CellarTracker tasting notes of all wines (red line, range 3.8 to 7.3), wines aged between 3 and 7 years (black line, range 4.3 to 4.8, except for 2005), wines aged between 3 and 10 years (blue line, range 4.7 to 5.8), or wines aged between 5 and 10 years (green line, range 5.9 to 7.4). Linear regression analysis revealed significant trends (*p* < 0.05) for all periods except for wines restricted to between 3 and 7 years (black line, *p* = 0.21).

**
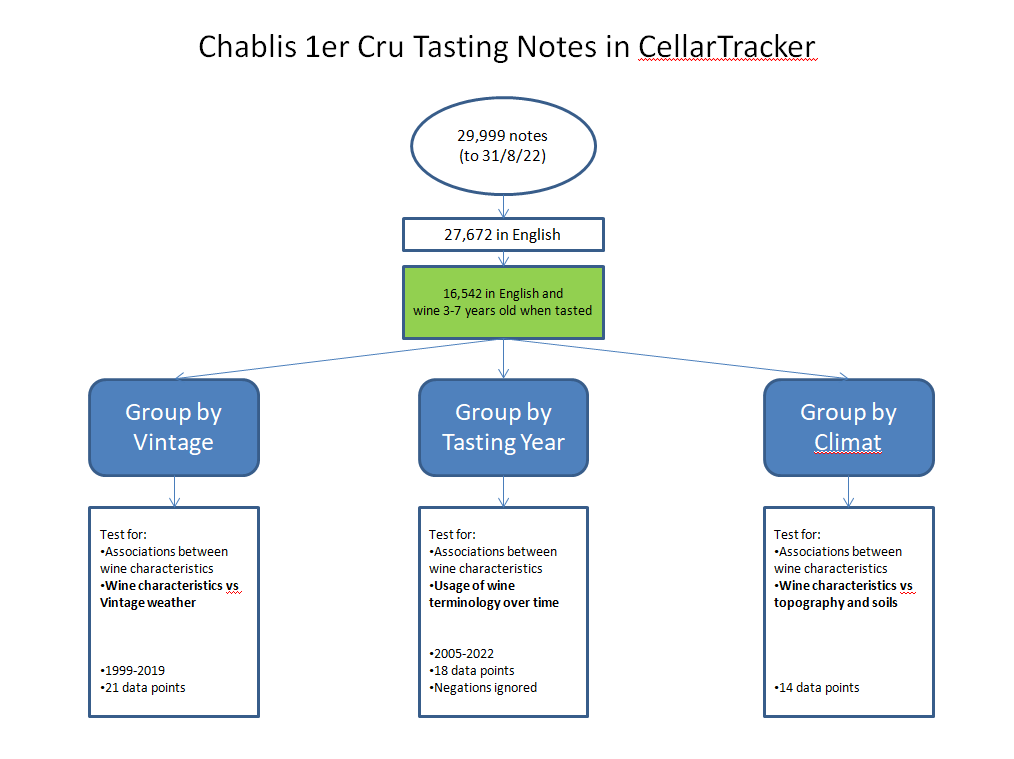
**

Supplementary Figure S2. Schematic diagram to show how the Chablis Premier Cru tasting notes from CellarTracker were organised into separate sub-databases for analyses.

Supplementary Table S2. Descriptive statistics for the CellarTracker Premier Cru tasting notes analysed. All wines were between 3 and 7 years of age when tasted.

| **Vintage** | **Notes** |  | **Year Tasted** | **Notes** |  | **Principal PC Climat** | **Bank** | **Notes** |
| --- | --- | --- | --- | --- | --- | --- | --- | --- |
| 1995 | 5 |  | 1998 | 4 |  | Beauregard | Left | 90 |
| 1996 | 9 |  | 1999 | 1 |  | Beauroy | Left | 361 |
| 1997 | 20 |  | 2000 | 5 |  | Côte de Léchet | Left | 871 |
| 1998 | 10 |  | 2001 | 4 |  | Côtes de Jouan | Left | 37 |
| 1999 | 50 |  | 2002 | 11 |  | Fourchaume | Right | 2546 |
| 2000 | 135 |  | 2003 | 30 |  | Generic | N/A | 582 |
| 2001 | 104 |  | 2004 | 35 |  | Generic Left Bank | Left | 1 |
| 2002 | 678 |  | 2005 | 118 |  | Generic Right Bank | Right | 5 |
| 2003 | 165 |  | 2006 | 241 |  | Les Fourneaux | Right | 244 |
| 2004 | 655 |  | 2007 | 384 |  | Mont de Milieu | Right | 973 |
| 2005 | 826 |  | 2008 | 519 |  | Montée de Tonnerre | Right | 2739 |
| 2006 | 712 |  | 2009 | 729 |  | Montmains | Left | 3865 |
| 2007 | 983 |  | 2010 | 843 |  | Vaillons | Left | 3228 |
| 2008 | 1387 |  | 2011 | 1024 |  | Vau de Vey | Left | 322 |
| 2009 | 1051 |  | 2012 | 1109 |  | Vaucoupin | Right | 395 |
| 2010 | 1346 |  | 2013 | 1179 |  | Vauligneau | Left | 91 |
| 2011 | 1041 |  | 2014 | 1143 |  | Vosgros | Left | 192 |
| 2012 | 1108 |  | 2015 | 1129 |  |  |  |  |
| 2013 | 702 |  | 2016 | 1007 |  |  |  |  |
| 2014 | 2028 |  | 2017 | 1181 |  |  | **Wine Age** | **Notes** |
| 2015 | 915 |  | 2018 | 1124 |  |  | 3 | 5088 |
| 2016 | 725 |  | 2019 | 1071 |  |  | 4 | 3828 |
| 2017 | 927 |  | 2020 | 1322 |  |  | 5 | 2997 |
| 2018 | 706 |  | 2021 | 1436 |  |  | 6 | 2567 |
| 2019 | 254 |  | 2022 | 893 |  |  | 7 | 2062 |

|  | **Users** | **Notes** |
| --- | --- | --- |
| Unique Users | 3960 | 16,542 |
| Users with 100+ Notes | 14 | 2082 |
| Users with 10-99 Notes | 324 | 6677 |
| Users with 5-9 Notes | 415 | 2717 |
| Users with 1-4 Notes | 3207 | 5066 |
|  |  |  |
|  | **Wines** | **Notes** |
| Unique Wines | 3684 | 16,542 |
| Wines with 100+ Notes | 1 | 105 |
| Wines with 10-99 Notes | 402 | 8086 |
| Wines with 5-9 Notes | 536 | 3491 |
| Wines with 1-4 Notes | 2745 | 4860 |

**
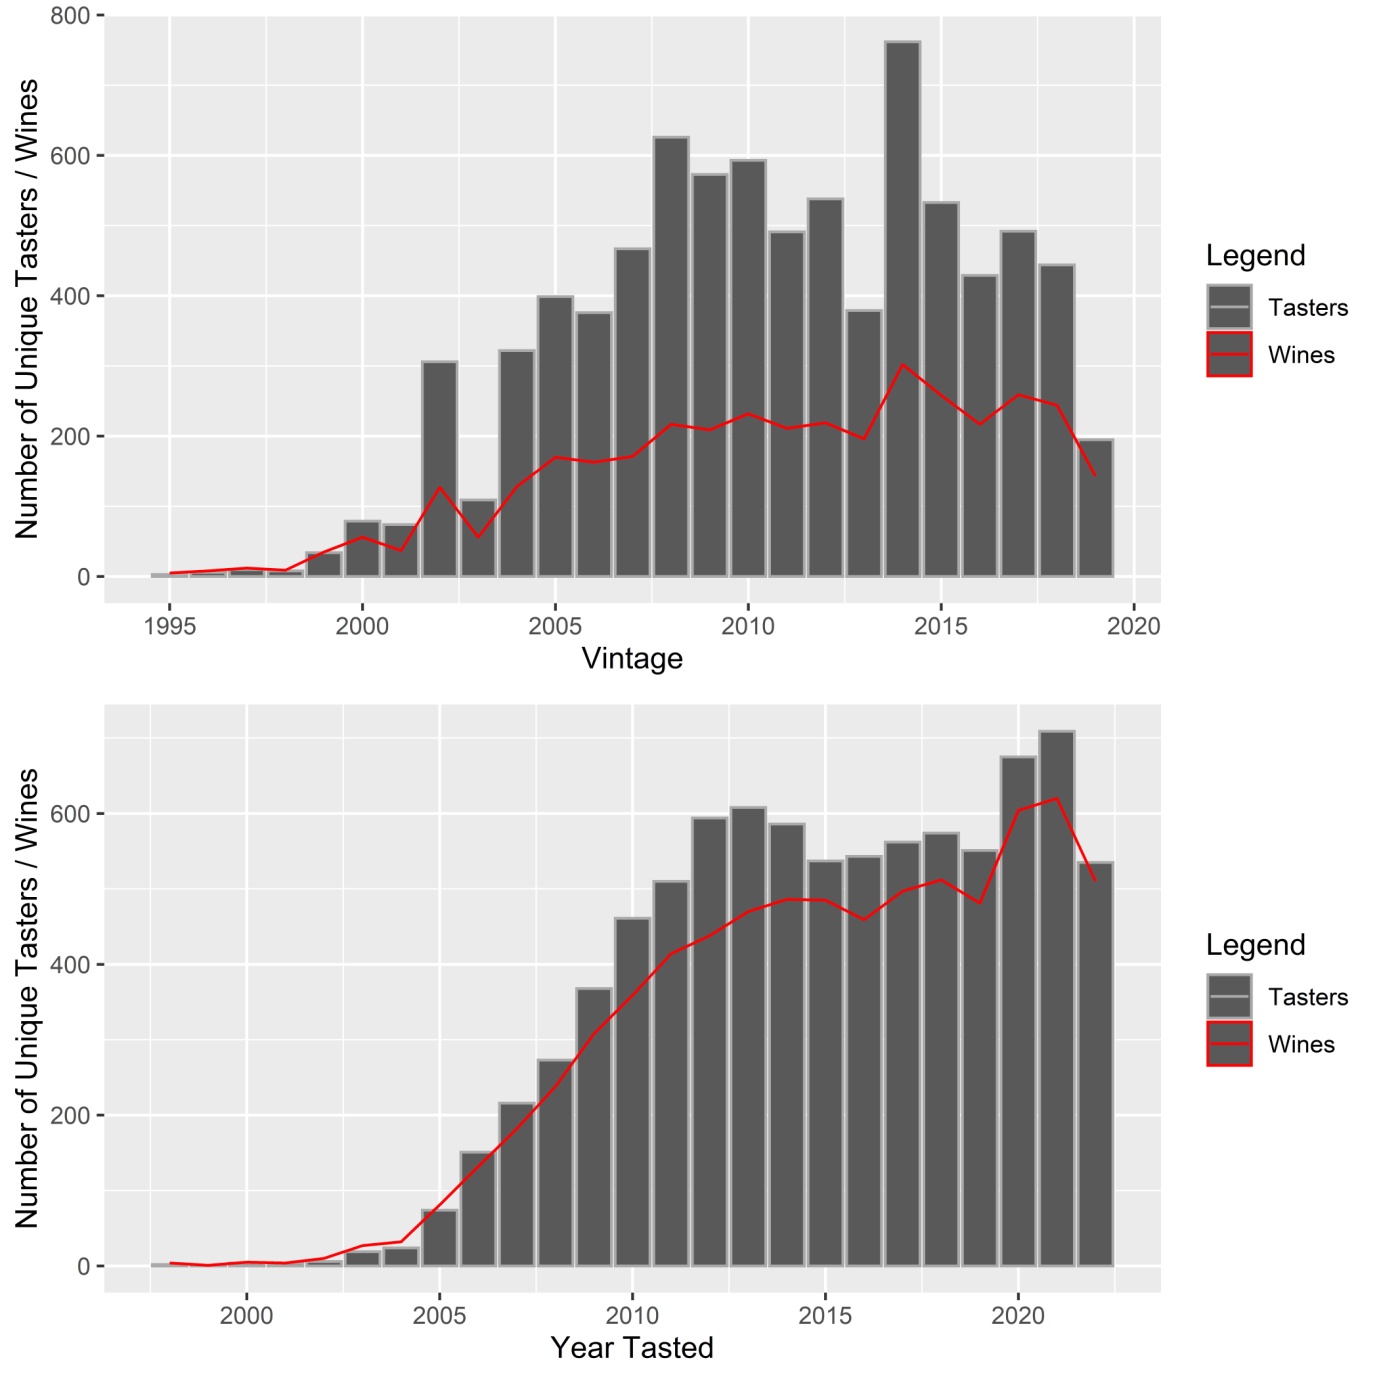
**

Supplementary Figure S3. Number of distinct tasters (grey bar) and wines (red line) per Vintage (top pane) and Year Tasted (bottom pane) for Chablis Premier Cru tasting notes from CellarTracker. All wines were between 3 and 7 years of age when tasted.

Supplementary Figure S4. Word groupings selected by the authors for text analysis of Chablis Premier Cru wine notes (see Materials and Methods). Overlapping areas represent either a) uncertainty in origin of aroma/flavour, e.g. smoky notes may come from oak ageing, reductive processes, or may relate to minerality, or b) similarity/relatedness of aroma or taste sensation, e.g. peach vs peach blossom (stone fruit vs floral). The dividing line represents flavours and aromas from primary sources (i.e. the grapes) and those from secondary (vinification) and tertiary (ageing) sources; the grey dashed line represents uncertainty regarding the origin (primary vs secondary/tertiary) of some aromas and flavours in groups which overlap it. The figure takes no account of possible masking effects between groupings or whether groups can be present in a wine simultaneously. For example, floral aromas/flavours may be found simultaneously with tropical fruit aromas/flavours, and exposure to lees *may* mask mineral aromas/flavours. Placement of circles is based on the authors’ schematic understanding of closeness/relatedness of word groups from the literature rather than any statistical study. Circles and overlapping areas are not drawn to any scale.

Supplementary Table S3. Component words and bigrams of descriptive word groups used for textual analysis of CellarTracker Premier Cru tasting notes.

| **Word Group** | **Component Words** | **Component Bigrams** |
| --- | --- | --- |
| Acidity | acid, acidey, acidic, acidity, acids, acidy |  |
|  |  |  |
| Citrus Fruit | citric, citrous, citrus, citrusey, citrusfruit, citruslike, citrussey, citrussy, citrusy, grapefruit, grapefruitey, grapefruits, grapefruity, lemon, lemoney, lemons, lemony, lime, limes, limey, limy |  |
|  |  |  |
| Floral | acacia, blossom, blossomey, blossoms, blossomy, camomile, chamomile, elderflower, elderflowers, floral, floraley, floralley, florally, florals, floraly, flower, flowerey, flower-like, flowers, flowery, geranium, geraniums, hawthorn, hawthorns, honeysuckle, honeysuckles, jasmine, jasmines, lavender, rose, rosehip, rosehips, roses, violet, violets |  |
|  |  |  |
| Lees | almond, almonds, biscuit, biscuits, bread, breadiness, breadish, bready, breadyness, brioche, cereal, croissant, croissants, dough, doughy, lees, leesy, maize, marzipan, oat, oats, oaty, pastries, pastry, rye, shortbread, walnut, walnuts, wheat, wheaty, yeast, yeastiness, yeastish, yeasty, yeastyness |  |
|  |  |  |
| Malolactic Fermentation (MLF) | beeswax, butter, buttercream, buttercreams, buttercrème, buttercrèmes, butterish, butterishness, butterscotch, buttery, cream, creaminess, creamy, creamyness, creme, crème, curd, diacetyl, lactic, malo, malolactic, mlf, silk, silkish, silkishness, silky, smooth, smoothness, velvet, velvetish, velvetishness, velvety, wax, waxey, waxy, yoghurt, yoghurtey, yoghurty |  |
|  |  |  |
| Minerality | mineral, minerality, minerall, minerallity, mineralls, minerally, minerals, mineraly |  |
|  |  |  |
| Oak | caramel, caramelly, caramely, coconut, coconuts, oak, oakey, oakier, oakiness, oakish, oakishness, oakness, oaky, oakyness, oakyshness, toast, toastie, toastiness, toasty, toastyness, toffee, toffees, vanilla, wood, woodiness, woody, woodyness |  |
|  |  |  |
| Orchard Fruit | apple, appleish, apple-ish, apples, appley, applish, gooseberries, gooseberry, pear, pearey, pearish, pears, peary | orchard fruit, orchard fruits |
|  |  |  |
| Reduction (Smoke) | cabbage, cabbagey, cabbagy, corn, egg, eggey, eggs, eggy, fusil, gunflint, gun-flint, gunflintey, gun-flintey, gunflinty, gun-flinty, gunmetal, gun-metal, gunpowder, lapsang, matchstick, match-stick, matchsticks, match-sticks, reduced, reduction, reductive, rubber, rubbery, skunk, skunky, smoke, smokey, smoky, sulfide, sulfides, sulfur, sulfurous, sulphide, sulphides, sulphur, sulphurous | bad drain, bad drains, gun flint, rotten drain, rotten drains, stinky drain, stinky drains, struck match, struck matches, match stick, match sticks |
|  |  |  |
| Saline | brine, brines, briney, brineyness, brinish, brinishness, briny, brinyness, iodeine, iodene, iodine, oceanic, oceans, oceanspray, ocean-spray, saline, salinity, salt, salted, saltiness, saltwater, salty, seabreeze, seasalt, seashore, seaside, seaspray, seawater, seaweed | ocean / sea: air, aroma, aromas, breeze, breezes, feeling, flavor, flavors, flavour, flavours, foam, mist, shore, side, spray, water, weed; tidal pool, tidal pools |
|  |  |  |
| Shellfish | oyster, oystershell, oystershells, seashell, seashells , shell, shelley, shellfishey, shellfishness, shellfishy, shelliness, shellish, shells, shelly, shellyness | oyster shell, oyster shells, shell fish |
|  |  |  |
| Stone Fruit | apricot, apricotey, apricotish, apricots, apricoty, nectarine, nectarines, nectariney, nectarinish, nectariny, peach, peaches, peachey, peachish, peachy | stone fruit, stone fruits, stoney fruit, stoney fruits, stony fruit, stony fruits |
|  |  |  |
| Stony | chalk, chalkey, chalkiness, chalkish, chalky, chalkyness, flint, flintey, flinty, granite, graphite, gravel, graveley, graveliness, gravelish, gravell, gravelley, gravelliness, gravelly, gravellyness, gravels, gravely, gravelyness, gypsum, lead-like, limestone, limestones, limestoney, limestony, marl, marley, marliness, marly, marlyness, pebble, pebbles, pebbley, pebbliness, pebbly, pebblyish, pebblyness, pencil, rock, rockey, rockiness, rockish, rocks, rocky, rockyness, shale, slate, slate-like, slatey, stone, stones, stoney, stony | wet stone, wet stones |
|  |  |  |
| Tropical Fruit | banana, bananas, candied, cantaloupe, fig, figs, guava, guavas, honeydew, jackfruit, jackfruits, kiwi, kiwis, lychee, lychees, mango, mangoes, mangoish, mango-ish, mangoness, mangos, melon, melons, melony, papaya, papayas, passionfruit, passion-fruit, passionfruits, pawpaw, pawpaws, pineapple, pineapples, pineappley, starfruit, starfruits, tropical, tropical-fruit, tropical-fruits | jack fruit, jack fruits, passion fruit, passion fruits, star fruit, star fruits |


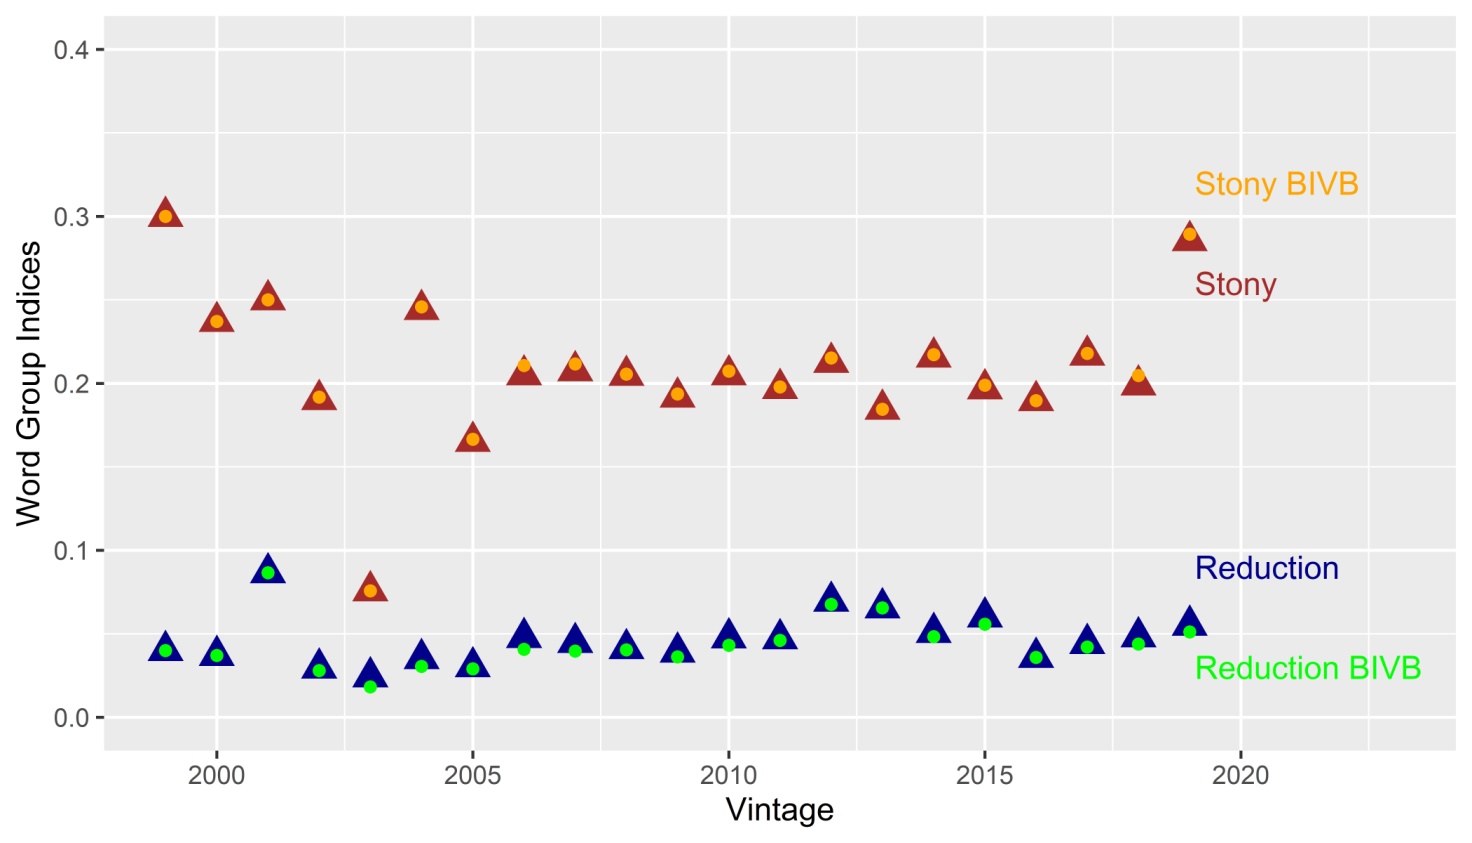


Supplementary Figure S5. Plot of stony and reduction word groups used to describe Chablis Premier Cru wine in CellarTracker tasting notes against Vintage before (circles) and after (triangles) the gunflint words were re-assigned from the stony word group (as per BIVB [40]) to the reduction word group. The words reassigned were "gunflint","gunflinty","fusil","gun-flint","gun-flinty","gunflintey","gun-flintey","gunpowder","gunmetal", and "gun-metal". Re-assignment of these words made little difference to the absolute values or trends.


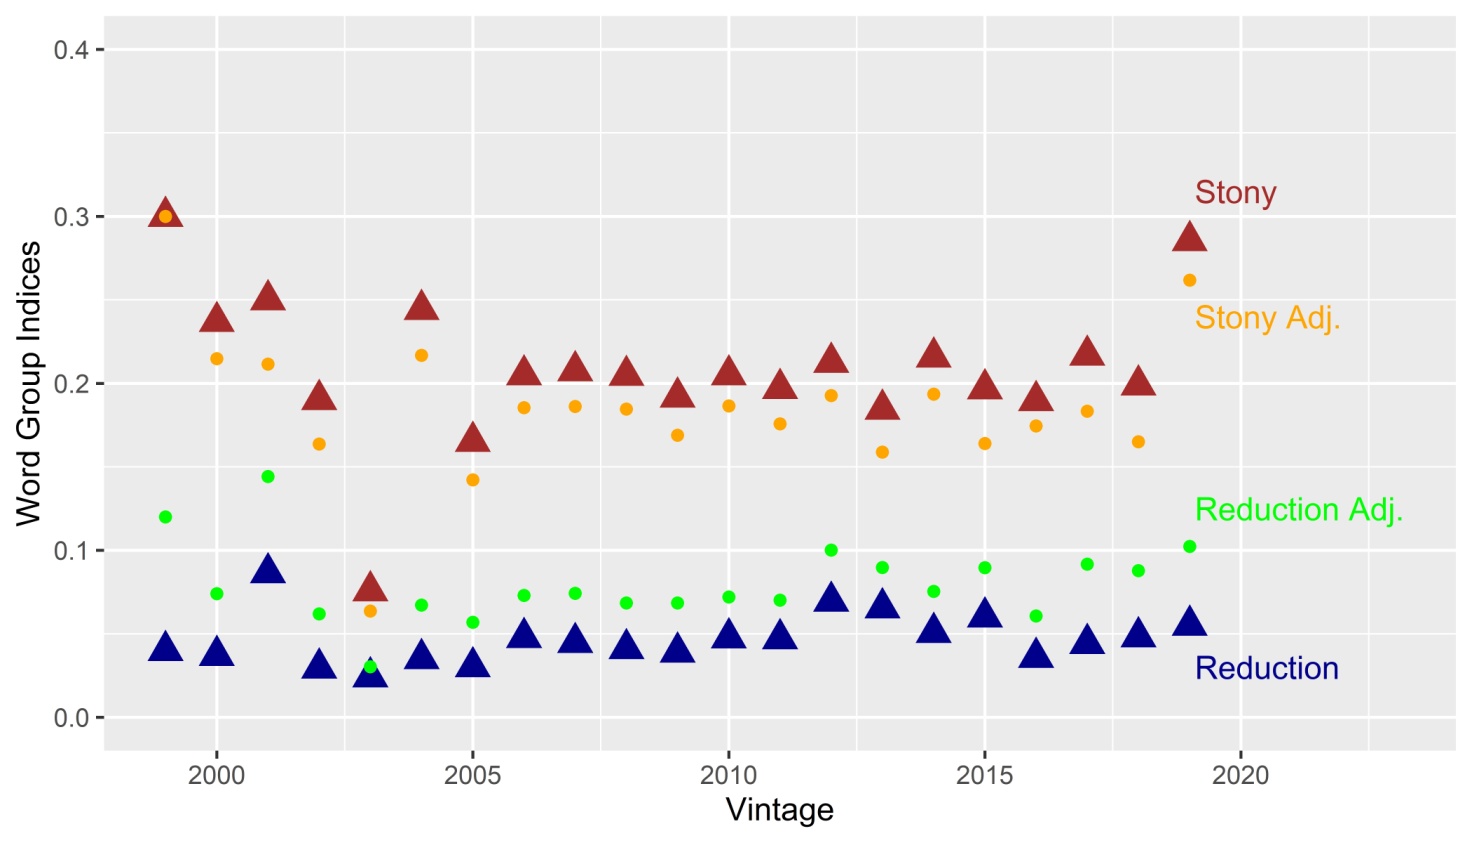


Supplementary Figure S6. Plot of stony and reduction word groups used to describe Chablis Premier Cru wine in CellarTracker tasting notes against Vintage before (triangles) and after (circles) the flint words were temporarily re-assigned from the stony word group to the reduction word group. The words temporarily reassigned were “flint”, “flintey”, and “flinty”. Despite the differences shown, the relationships between these two word groups and the other variables under study were mostly unchanged by re-assignment in terms of which were significant and which were not, except for three: i) The linear regression between reduction and Tasting Year (Table S4) and ii) the Spearman’s rank correlation between reduction and UCS30 soil type (Table S5), were both no longer significant with Bonferroni correction; iii) The Spearman’s rank correlation between reduction and slope gradient became significant (*p* < 0.05) but not with Bonferroni correction (Table S5). Note the flint words were left in the stony word group for all analyses presented in the paper.

Supplementary Table S4. Median, interquartile range (IQR), and linear trend in the reduction and stony word groups used to describe Chablis Premier Cru wine in CellarTracker tasting notes against a) Vintage (1999 to 2019) and b) Tasting Year (2005 to 2022), before and after (“Adj.”) flint words were temporarily re-assigned from the stony word group to the reduction word group. The word group indices range in value from 0 (zero presence) to 1 (found in 100% of all tasting notes); thus a slope of 0.01 is effectively a 1% increase per year of the word group in absolute terms. Note the linear regression between reduction and Tasting Year would no longer be significant with Bonferroni correction (*p* > 0.0036, i.e. 0.05 / 14, in bold). All wines were between 3 and 7 years of age when tasted.

|  | **Median** | **IQR** | **Slope** | **SE** | **R2** | ***p*** |
| --- | --- | --- | --- | --- | --- | --- |
| **a) Vintage (1999 to 2019)** |  |  |  |  |  |  |
| Reduction | 0.04 | 0.01 | 0.0006 | 0.0005 | 0.07 | 0.260 |
| Reduction Adj. | 0.07 | 0.02 | 0.0002 | 0.0009 | 0.00 | 0.858 |
| Stony | 0.21 | 0.03 | -0.0001 | 0.0016 | 0.00 | 0.940 |
| Stony Adj. | 0.18 | 0.03 | -0.0006 | 0.0017 | 0.01 | 0.744 |
|  |  |  |  |  |  |  |
| **b) Tasting Year (2005 to 2022)** |  |  |  |  |  |  |
| Reduction | 0.05 | 0.02 | 0.0018 | 0.0004 | 0.57 | **0.000** |
| Reduction Adj. | 0.08 | 0.02 | 0.0013 | 0.0005 | 0.31 | **0.016** |
| Stony | 0.20 | 0.02 | 0.0001 | 0.0007 | 0.00 | 0.851 |
| Stony Adj. | 0.18 | 0.02 | 0.0003 | 0.0006 | 0.01 | 0.632 |

Supplementary Table S5. Significant Spearman’s rank correlation coefficients (*p* < 0.10) between reduction and stony word groups and other variables under study, before (“Presented in Paper”) and after (“Adjusted for Flint Words”) flint words were temporarily re-assigned from the stony word group to the reduction word group. Significant differences are marked in bold. Only the relationship between reduction and USC30 soil type as presented in the paper, however, was significant with Bonferroni correction (*p* < 0.0045, i.e. 0.05 / 11). All wines were Chablis Premier Cru and between 3 and 7 years of age when tasted. Tasting notes were recorded in CellarTracker.

|  | **Presented in Paper** | |  | **Adjusted for Flint Words** | |
| --- | --- | --- | --- | --- | --- |
|  | ***rs*** | ***p*** |  | ***rs*** | ***p*** |
| Reduction vs UCS30 Soil Type | **0.87** | **0.001** |  | **0.63** | **0.017** |
| Reduction vs Slope Gradient | **-0.33** | **0.253** |  | **-0.54** | **0.048** |
| Stony vs Relative Elevation | 0.59 | 0.029 |  | 0.60 | 0.025 |
| Stony vs Slope Gradient | -0.56 | 0.038 |  | -0.55 | 0.044 |

**
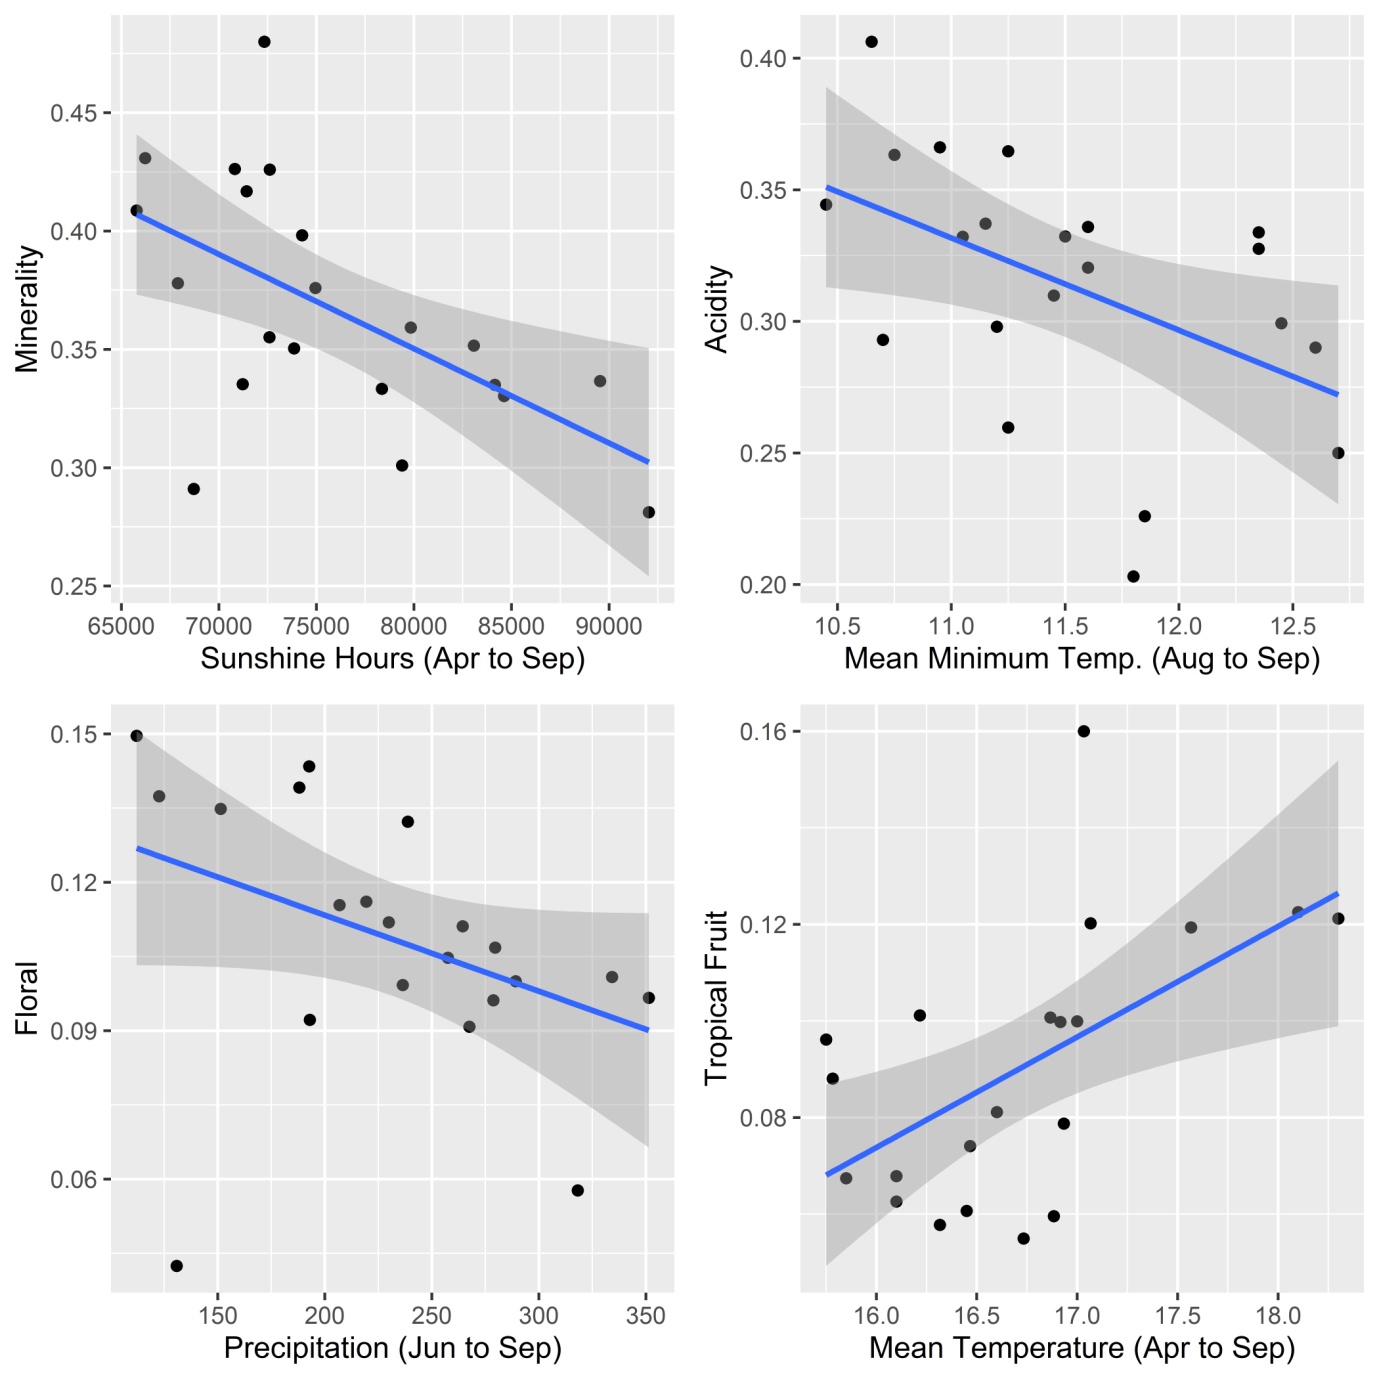
**

Supplementary Figure S7. Selected significant Spearman’s rank correlation scatterplots (*p* < 0.05) between word groups used to describe Chablis Premier Cru wine in the CellarTracker database and certain vintage weather variables: Minerality vs Sunshine Hours from 1 April to 30 September (top left); Acidity vs Mean Minimum Temperature (°C) in August and September (top right); Floral vs Precipitation (mm) from 1 June to 30 September (bottom left); Tropical Fruit vs Mean Temperature (°C) from 1 April to 30 September (bottom right). All wines were between 3 and 7 years of age when tasted.
